# Supplementary material
Source: PubMed Central journal article supplement (PMC4937988)
Supplement: NIHMS64518-supplement-Supplementary_data.pdf [file NIHMS64518-supplement-Supplementary_data.pdf]

## Appendix A. Supplementary tables

| Name (with website)                                                                                                                   | Description                                                                                                      | Reference |
|---------------------------------------------------------------------------------------------------------------------------------------|------------------------------------------------------------------------------------------------------------------|-----------|
| CAZy (Carbohydrate Active Enzymes database; <a href="http://www.cazy.org/">http://www.cazy.org/</a> )                                 | Database classifying catalytic and functional domains of enzymes degrading, modifying, creating glycosidic bonds | SR[1]     |
| e-Fungi ( <a href="http://www.cs.man.ac.uk/~cornell/eFungi/database.html">http://www.cs.man.ac.uk/~cornell/eFungi/database.html</a> ) | Database allowing comparative studies of fungal genomes                                                          | SR[2]     |
| Fungal Transcription Factor Database (FTFD; <a href="http://ftfd.snu.ac.kr/">http://ftfd.snu.ac.kr/</a> )                             | Database archiving fungal transcription factors and enabling comparative phylogenetic studies                    | SR[3]     |
| The Seoul National University Genome Browser (SNUGB; <a href="http://genomebrowser.snu.ac.kr/">http://genomebrowser.snu.ac.kr/</a> )  | Platform enabling comparative and functional fungal genomics                                                     | SR[4]     |
| Comparative Fungal Genomics Platform (CFGP; <a href="http://cfgp.snu.ac.kr/">http://cfgp.snu.ac.kr/</a> )                             | Comparative genomics platform enabling searches across different species                                         | SR[5, 6]  |

|                                                                                                                                      |                                                                                                  |        |
|--------------------------------------------------------------------------------------------------------------------------------------|--------------------------------------------------------------------------------------------------|--------|
|                                                                                                                                      | simultaneously                                                                                   |        |
| Fungal Secretome Database<br>( <a href="http://fsd.snu.ac.kr/intro.php">http://fsd.snu.ac.kr/intro.php</a> )                         | Archive of fungal secreted proteins allowing also data analysis                                  | SR[7]  |
| Fungal Growth Database ( <a href="http://www.fungal-growth.org">www.fungal-growth.org</a> )                                          | Repository of fungal growth profiles on different C sources derived from plant biomass           | -      |
| FungiDB ( <a href="http://FungiDB.org">http://FungiDB.org</a> )                                                                      | Database for fungal functional genomics                                                          | SR[8]  |
| Fungal PCWDE Database<br>( <a href="http://pcwde.riceblast.snu.ac.kr/">http://pcwde.riceblast.snu.ac.kr/</a> )                       | Platform archiving fungal wall degrading enzymes enabling also data analysis                     | SR[9]  |
| MycoCosm ( <a href="http://jgi.doe.gov/fungi">http://jgi.doe.gov/fungi</a> )                                                         | Portal entirely dedicated to comparative genomics of fungi and promoting community participation | SR[10] |
| Fungal peroxidase database (fPoxDB;<br><a href="http://peroxidase.riceblast.snu.ac.kr/">http://peroxidase.riceblast.snu.ac.kr/</a> ) | Database enabling comparative genomics of fungal peroxidases                                     | SR[11] |

|                                                                                                                                                                                                            |                                                                                                                                           |               |
|------------------------------------------------------------------------------------------------------------------------------------------------------------------------------------------------------------|-------------------------------------------------------------------------------------------------------------------------------------------|---------------|
| <p><i>myco</i>CLAP-Characterized<br/>Lignocellulose-Active Proteins of Fungal<br/>Origin<br/>(<a href="https://mycoclap.fungalgenomics.ca/mycoCLAP/">https://mycoclap.fungalgenomics.ca/mycoCLAP/</a>)</p> | <p>Database of fungal<br/>lignocellulose-active<br/>proteins which have been<br/>characterized from the<br/>biochemical point of view</p> | <p>SR[12]</p> |
| <p>1000 Fungal Genomes Project (1KFG;<br/><a href="http://1000.fungalgenomes.org/home/">http://1000.fungalgenomes.org/home/</a>)</p>                                                                       | <p>Project aiming at<br/>sequencing more than<br/>1000 fungal genomes</p>                                                                 | <p>-</p>      |
| <p>Aspergillus Genome Database (AspGD;<br/><a href="http://www.aspgd.org/">http://www.aspgd.org/</a>)</p>                                                                                                  | <p>Database enabling<br/>comparative genomics of<br/><i>Aspergillii</i></p>                                                               | <p>-</p>      |

**Supplementary Table 1.** Summary of some of the available databases/platforms for fungal cross-comparative studies. Details concerning their description and references are provided. SR, Supplementary Reference.

| Organism                                                                           | Enzyme                                                    | $k_{cat}$<br>( $\text{min}^{-1}$ )                                                                    | $T_{opt}$<br>( $^{\circ}\text{C}$ )                      | $\text{pH}_{opt}$                       | Salt                           | Domain/<br>Kingdom | Ref               |
|------------------------------------------------------------------------------------|-----------------------------------------------------------|-------------------------------------------------------------------------------------------------------|----------------------------------------------------------|-----------------------------------------|--------------------------------|--------------------|-------------------|
| Metagenomic library<br>(Himalayan soil)                                            | Endo-cellulase <sup>P</sup>                               | 1,500 (CMC)<br>(28 $^{\circ}\text{C}$ )                                                               | 28-30                                                    | 5.0                                     | N/A                            | Bacteria           | SR<br>[13]        |
| <i>Pseudoalteromonas<br/>haloplanktis</i>                                          | Xylanase <sup>P</sup>                                     | 31,000 (10 $^{\circ}\text{C}$ )                                                                       | 35                                                       | N/A                                     | N/A                            |                    | [120]             |
| <i>Streptomyces</i> sp.                                                            | Xylanase <sup>M</sup>                                     | 3,600 (10 $^{\circ}\text{C}$ )                                                                        | 50                                                       | N/A                                     | N/A                            |                    | SR<br>[14]        |
| <i>P. haloplanktis</i>                                                             | Endo-cellulase <sup>P</sup>                               | 11(pNPC)                                                                                              | 45                                                       | N/A                                     | N/A                            |                    | SR<br>[15,<br>16] |
| <i>Erwinia chrysanthemi</i><br>( <i>Dickeya dadantii</i> )                         | Endo-cellulase <sup>T</sup>                               | 0.6 (pNPC)<br>(4 $^{\circ}\text{C}$ )                                                                 | 55                                                       | N/A                                     | N/A                            |                    | SR<br>[17]        |
| <i>Bacillus subtilis</i>                                                           | Endo-cellulase <sup>PE</sup>                              | 14,760 (CMC) <sup>WT</sup><br>26,220<br>(CMC) <sup>SDM-T</sup>                                        | 60                                                       | 4.0-<br>6.0                             | N/A                            |                    | [119]             |
| <i>Bacillus aquimaris</i>                                                          | Endo-cellulase <sup>AL</sup>                              | N/A                                                                                                   | 45                                                       | 11.0                                    | N/A                            |                    | SR<br>[18]        |
| <i>Thermoascus<br/>aurantiacus</i>                                                 | Endo-cellulase <sup>T</sup>                               | 239 (CMC) <sup>WT</sup><br>995 (CMC) <sup>SDM</sup><br>(70 $^{\circ}\text{C}$ )                       | 70 <sup>WT</sup><br>70 <sup>SDM</sup>                    | 5.0 <sup>WT</sup><br>5.0 <sup>SDM</sup> | N/A                            |                    | SR<br>[19]        |
| <i>Geobacillus<br/>thermoleovorans</i>                                             | Xylanase <sup>PE</sup>                                    | 16,834 (xylan)<br>80 $^{\circ}\text{C}$                                                               | 80<br>(40-<br>100)                                       | 8.5<br>(6-12)                           | N/A                            |                    | SR<br>[20]        |
| <i>Bacillus pumilus</i>                                                            | Endo-cellulase <sup>AL</sup>                              | N/A                                                                                                   | 50                                                       | 10.0                                    | N/A                            |                    | SR<br>[21]        |
| <i>Dictyoglomus<br/>thermophilum</i>                                               | Endo-cellulase <sup>H,T</sup>                             | N/A                                                                                                   | 50-85                                                    | 5.0                                     | 2-4 M                          |                    | SR<br>[22]        |
| <i>Caldicellulosiruptor<br/>bescii</i>                                             | Endo-cellulase,<br>Hemicellulase<br>System <sup>T</sup>   | N/A                                                                                                   | 75<br>(Grass,<br>Avicel)<br>85<br>(CMC)8<br>5<br>(xylan) | 5.0-<br>6.0                             | N/A                            |                    | SR<br>[23]        |
| <i>Thermomonospora<br/>fusca</i>                                                   | Xylanase <sup>T</sup>                                     | N/A                                                                                                   | 80                                                       | 6.0                                     | N/A                            |                    | SR<br>[24]        |
| <i>Thermoascus<br/>aurantiacus</i> SL16W                                           | Xylanase <sup>T/ILT</sup>                                 | N/A                                                                                                   | 75                                                       | 4.5                                     | N/A                            |                    | SR<br>[25]        |
| <i>Zunongwangia<br/>profunda</i>                                                   | Xylanase <sup>PE/ILT</sup>                                | 2836 (- NaCl)<br>4820 (+ 3M<br>NaCl)                                                                  | 30                                                       | 6.5                                     | 3-5 M                          |                    | SR<br>[26]        |
| <i>Gracilibacillus</i> sp.                                                         | Xylanase <sup>PE</sup>                                    | N/A                                                                                                   | 60<br>(50-70)                                            | 7.5<br>(5.0-<br>10.0)                   | 0-30 %                         |                    | SR<br>[27]        |
| <i>Fervidobacterium<br/>gondwanense</i>                                            | Endo-cellulase,<br>Xylanase fusion<br>enzyme <sup>T</sup> | Higher activity<br>than individual<br>enzymes                                                         | 80 ( $\beta$ -<br>glucan)<br>70<br>(xylan)               | 6.0                                     | N/A                            |                    | [112]             |
| <i>Halorhabdus<br/>utahensis</i> CBH1                                              | Endo-cellulase <sup>PE</sup>                              | N/A                                                                                                   | 80 (5 M<br>NaCl)                                         | 9.0-<br>10.0                            | 5M<br>(80 $^{\circ}\text{C}$ ) |                    | SR<br>[26]        |
| <i>Pyrobaculum</i> -like,<br><i>Thermofilum</i> -like,<br><i>Ignisphaera</i> -like | Endo-cellulase <sup>PE</sup>                              | N/A                                                                                                   | 109<br>(CMC,<br>Avicel)                                  | 6.8                                     | 2.5-3.5<br>M                   |                    | [80]              |
| <i>Thermotoga<br/>maritima</i>                                                     | Endo-cellulase <sup>HT</sup>                              | 47,460 ( $\beta$ lucan) <sup>WT</sup><br>69,300 ( $\beta$ -glucan)<br>SDM<br>(85 $^{\circ}\text{C}$ ) | 85 <sup>WT</sup><br>100 <sup>SDM</sup>                   | N/A                                     | N/A                            |                    | SR<br>[118]       |
| <i>Sulfolobus<br/>solfataricus</i> /<br><i>Thermotoga maritima</i>                 | Endo-cellulase <sup>PE</sup>                              | 30<br>(hexasaccharide)<br>(80 $^{\circ}\text{C}$ )                                                    | 80                                                       | 1.8                                     | N/A                            | SR<br>[27]         |                   |
| <i>Scopulariopsis</i> sp.                                                          | Xylanase <sup>T</sup>                                     | 95,000 (40 $^{\circ}\text{C}$ )                                                                       | 50                                                       | N/A                                     | N/A                            | [120]              |                   |
| <i>Trichoderma reesei</i>                                                          | $\beta$ -glucosidase <sup>T</sup>                         | 3,090 (cellobiose)<br>(50 $^{\circ}\text{C}$ )                                                        | 65-70                                                    | 4.6                                     | N/A                            | SR<br>[28]         |                   |
| <i>Talaromyces<br/>emersonii</i>                                                   | $\beta$ -glucosidase <sup>PE</sup>                        | N/A                                                                                                   | 72                                                       | 4.0                                     | N/A                            | SR<br>[29]         |                   |
| <i>Aspergillus</i>                                                                 | Endo-cellulase,                                           | N/A                                                                                                   | 70                                                       | 2.0                                     | N/A                            | SR                 |                   |

|                                                 |                                                           |                                      |    |             |     |            |
|-------------------------------------------------|-----------------------------------------------------------|--------------------------------------|----|-------------|-----|------------|
| <i>terreus</i> M11                              | $\beta$ -glucosidase <sup>PE</sup>                        |                                      | 70 | 3.0         |     | [30]       |
| <i>Trichoderma viride</i>                       | Endo-cellulase <sup>M</sup>                               | 574 (CMC)<br>108 (Avicel)<br>(50 °C) | 60 | 6.0         | N/A | SR<br>[31] |
| <i>T. emersonii</i>                             | Exo-cellulase <sup>T</sup>                                | 31 (Mul)<br>(22 °C)                  | 65 | 4.0-<br>5.0 | N/A | SR<br>[32] |
| <i>Penicillium citrinum</i><br>YS40-5           | $\beta$ -glucosidase <sup>PE</sup>                        | N/A                                  | 70 | 5.0         | N/A | SR<br>[33] |
| <i>Humicola grisea</i><br>Var <i>thermoidea</i> | Exo-cellulase <sup>PE</sup>                               | N/A                                  | 60 | 8.0         | N/A | SR<br>[34] |
| <i>Aspergillus fumigatus</i>                    | Endo-cellulase,<br>Exo-cellulase<br>Xylanase <sup>T</sup> | N/A                                  | 70 | 3.0         | N/A | SR<br>[35] |
|                                                 |                                                           |                                      | 60 | 5.0         |     |            |
|                                                 |                                                           |                                      | 60 | 4.0         |     |            |

**Supplementary Table 2:** Catalytic properties of mesophilic, extremophilic and genetically-modified plant cell wall degrading enzymes from bacteria, archaea and fungi. Legend: SR, Supplementary Reference; CMC (amorphous) carboxymethylcellulose; Avicel, crystalline cellulose; Mul, 4-methylumbelliferyl- $\beta$ -D-galactopyranoside; pNPC, p-nitrophenyl- $\beta$ -D-cellobioside; P, psychrophilic; T, thermophilic; HT, hyperthermophilic; PE, polyextremophilic; M, mesophilic; ILT, ionic liquid-tolerant; AL, alkaliphilic; H, halophilic; WT, wild-type; SDM, site-directed mutant; SDM-T, truncated mutant.

## Supplementary references

- [1]. B.L. Cantarel, et al., The Carbohydrate-Active EnZymes database (CAZy): an expert resource for Glycogenomics, *Nucleic Acids Res.* 37 (2009) D233-238.
- [2]. J. Park, et al., Fungal cytochrome P450 database, *BMC Genomics* 9 (2008) 402.
- [3]. J. Park, et al., FTFD: an informatics pipeline supporting phylogenomic analysis of fungal transcription factors, *Bioinformatics* 24 (2008) 1024-1025.
- [4]. K. Jung, et al., SNUGB: a versatile genome browser supporting comparative and functional fungal genomics, *BMC Genomics* 9 (2008) 586.
- [5]. J. Park, et al., CFGP: a web-based, comparative fungal genomics platform, *Nucleic Acids Res.* 36 (2008) D562-571.
- [6]. J. Choi, et al., CFGP 2.0: a versatile web-based platform for supporting comparative and evolutionary genomics of fungi and Oomycetes, *Nucleic Acids Res.* 41 (2013) D714-719.
- [7]. J. Choi, et al., Fungal secretome database: integrated platform for annotation of fungal secretomes, *BMC Genomics* 11 (2010) 105.
- [8]. J.E. Stajich, et al., FungiDB: an integrated functional genomics database for fungi, *Nucleic Acids Res.* 40 (2012) D675-681.
- [9]. J. Choi, K.T. Kim, J. Jeon, Y.H. Lee, Fungal plant cell wall-degrading enzyme database: a platform for comparative and evolutionary genomics in fungi and Oomycetes, *BMC Genomics* 14 (2013) S7.
- [10]. I.V. Grigoriev, et al., MycoCosm portal: gearing up for 1000 fungal genomes, *Nucleic Acids Res.* 42 (2014) D699-704.

- 1  
2  
3  
4  
5  
6  
7  
8  
9  
10  
11  
12  
13  
14  
15  
16  
17  
18  
19  
20  
21  
22  
23  
24  
25  
26  
27  
28  
29  
30  
31  
32  
33  
34  
35  
36  
37  
38  
39  
40  
41  
42  
43  
44  
45  
46  
47  
48  
49  
50  
51  
52  
53  
54  
55  
56  
57  
58  
59  
60  
61  
62  
63  
64  
65
- [11]. J. Choi, et al., fPoxDB: fungal peroxidase database for comparative genomics, *BMC Microbiol.* 14 (2014) 117.
- [12]. C. Murphy, J. Powlowski, M. Wu, G. Butler, A. Tsang, Curation of characterized glycoside hydrolases of fungal origin, Database (2011) bar020.
- [13]. A. Bhat, S. Riyaz-Ul-Hassan, N. Ahmad, N. Srivastava, S. Johri, Isolation of cold-active, acidic endo-cellulase from Ladakh soil by functional metagenomics, *Extremophiles* 17 (2013) 229-239.
- [14]. G.K. Sonan, et al., The linker region plays a key role in the adaptation to cold of the cellulase from an Antarctic bacterium, *Biochem. J.* 407 (2007) 293-302.
- [15]. Y. Wang, H. Yuan, J. Wang, Z. Yu, Truncation of the cellulose binding domain improved thermal stability of endo-beta-1,4-glucanase from *Bacillus subtilis* JA18, *Bioresour. Technol.* 100 (2009) 345-349.
- [16]. R. Rawat, L. Tewari, Purification and characterization of an acidothermophilic cellulase enzyme produced by *Bacillus subtilis* strain LFS3, *Extremophiles* 16 (2012) 637-644.
- [17]. N. Trivedi, et al., Solvent tolerant marine bacterium *Bacillus aquimaris* secreting organic solvent stable alkaline cellulase, *Chemosphere* 83 (2011) 706-712.
- [18]. D. Verma, T. Satyanarayana, Cloning, expression and applicability of thermo-alkali-stable xylanase of *Geobacillus thermoleovorans* in generating xylooligosaccharides from agro-residues, *Bioresour. Technol.* 107 (2012) 333-338.

- 1  
2  
3  
4  
5  
6  
7  
8  
9  
10  
11  
12  
13  
14  
15  
16  
17  
18  
19  
20  
21  
22  
23  
24  
25  
26  
27  
28  
29  
30  
31  
32  
33  
34  
35  
36  
37  
38  
39  
40  
41  
42  
43  
44  
45  
46  
47  
48  
49  
50  
51  
52  
53  
54  
55  
56  
57  
58  
59  
60  
61  
62  
63  
64  
65
- [19]. E.Z. Gomaa, Optimization and characterization of alkaline protease and carboxymethyl-cellulase produced by *Bacillus pumillus* grown on *Ficus nitida* wastes, Braz. J. Microbiol. 44 (2013) 529-537.
- [20]. R. Shi, Z. Li, Q. Ye, J. Xu, Y. Liu, Heterologous expression and characterization of a novel thermo-halotolerant endo-glucanase Cel5H from *Dictyoglomus thermophilum*, Bioresour. Technol. 142 (2013) 338-344.
- [21]. S. Kanafusa-Shinkai, et al., Degradation of microcrystalline cellulose and non-pretreated plant biomass by a cell-free extracellular cellulase/hemicellulase system from the extreme thermophilic bacterium *Caldicellulosiruptor bescii*, J. Biosci. Bioeng. 115 (2013) 64-70.
- [22]. S. Zhang, Y. He, H. Yu, Z. Dong, Seven N-terminal residues of a thermophilic xylanase are sufficient to confer hyperthermostability on its mesophilic counterpart, PLoS One 9 (2014) e87632.
- [23]. N. Chawachart, et al., Thermal behaviour and tolerance to ionic liquid [emim]OAc in GH10 xylanase from *Thermoascus aurantiacus* SL16W, Extremophiles 18 (2014) 1023-1034.
- [24]. X. Liu, Z. Huang, X. Zhang, Z. Shao, Z. Liu, Cloning, expression and characterization of a novel cold-active and halophilic xylanase from *Zunongwangia profunda*, Extremophiles 18 (2014) 441-450.
- [25]. V.G. Poosarla, T.S. Chandra, Purification and characterization of novel halo-acid-alkali-thermo-stable xylanase from *Gracilibacillus* sp. TSCPVG, Appl. Biochem. Biotechnol. 173 (2014) 1375-1390.
- [26]. T. Zhang, et al., Identification of a haloalkaliphilic and thermostable cellulase with improved ionic liquid tolerance, Green Chem. 13 (2011) 2083-2090.



- 1  
2  
3  
4  
5  
6  
7  
8  
9  
10  
11  
12  
13  
14  
15  
16  
17  
18  
19  
20  
21  
22  
23  
24  
25  
26  
27  
28  
29  
30  
31  
32  
33  
34  
35  
36  
37  
38  
39  
40  
41  
42  
43  
44  
45  
46  
47  
48  
49  
50  
51  
52  
53  
54  
55  
56  
57  
58  
59  
60  
61  
62  
63  
64  
65
- [27]. K. Kufner, G. Lipps, Construction of a chimeric thermoacidophilic beta-endo-glucanase, *BMC Biochem.* 14 (2013) 11.
- [28]. H. Chen, M. Hayn, H.Esterbauer, Purification and characterization of two extracellular beta-glucosidases from *Trichoderma reesei*, *Biochim. Biophys. Acta* 1121 (1992) 54-60.
- [29]. P. Murray, et al., Expression in *Trichoderma reesei* and characterisation of a thermostable family 3 beta-glucosidase from the moderately thermophilic fungus *Talaromyces emersonii*, *Protein Expr. Purif.* 38 (2004) 248-257.
- [30]. J. Gao, et al., Production and characterization of cellulolytic enzymes from the thermoacidophilic fungal *Aspergillus terreus* M11 under solid-state cultivation of corn stover, *Bioresour. Technol.* 99 (2008) 7623-7629.
- [31]. X.M. Huang, et al., Cloning and heterologous expression of a novel endo-glucanase gene egVIII from *Trichoderma viride* in *Saccharomyces cerevisiae*, *Appl. Biochem. Biotechnol.* 162 (2010) 103-115.
- [32]. S.P. Voutilainen, P.G. Murray, M.G. Tuohy, A. Koivula, Expression of *Talaromyces emersonii* cellobiohydrolase Cel7A in *Saccharomyces cerevisiae* and rational mutagenesis to improve its thermostability and activity, *Protein Eng. Des. Sel.* 23 (2010) 69-79.
- [33]. I.S. Ng, et al., High-level production of a thermoacidophilic beta-glucosidase from *Penicillium citrinum* YS40-5 by solid-state fermentation with rice bran, *Bioresour. Technol.* 101 (2010) 1310-1317.
- [34]. G.S. Oliveira, et al., An alkaline thermostable recombinant *Humicola grisea* var. *thermoidea* cellobiohydrolase presents bifunctional (endo/exo-

glucanase) activity on cellulosic substrates, World J. Microbiol. Biotechnol.

29 (2013) 19-26.

- [35]. S.K. Ang, E.M. Shaza, Y. Adibah, A.A. Suraini, M.S. Madihah,  
Production of cellulases and xylanase by *Aspergillus fumigatus* SK1 using  
untreated oil palm trunk through solid state fermentation, Process Biochem. 48  
(2013) 1293-1302.
